# Supplementary material for: Comprehensive Analysis of Copy Number Variations on Glycoside Hydrolase 45 Genes among Different Bursaphelenchus xylophilus Strains
Source: Int J Mol Sci. 2022 Dec 5;23(23):15323. doi: 10.3390/ijms232315323 (PMC9735991; doi:10.3390/ijms232315323)
Supplement: Supplementary file 1 [file ijms-23-15323-s001.zip › Supplementary Table S1.xlsx]

## Sheet: Sheet1
Supplementary Table S1. Sampling information and copy number variations of Bursaphelenchus xylophilus strains
Strain ID	Sampling location	Host	Sampling time	Copy number
AH01	Wuwei County, Wuhu City, Anhui Province	Pinus massoniana Lamb.	2014.12	2
AH02	Shuidong Town, Xuanzhou District, Xuancheng City, Anhui Province	P.massoniana Lamb.	2015.3.9	2
AH03	Quanjiao County, Chuzhou City, Anhui Province	unknown	2015.3	2
AH04	Xinhang Town, Guangde County, Xuancheng City, Anhui Province	unknown	2015.3	2
AH05	Lujiang County, Hefei City, Anhui Province	P.massoniana Lamb.	2015.3	2
AH06	Qingshan Forest Farm, Dangtu, Ma'anshan City, Anhui Province	P.massoniana Lamb.	2015.08	2
AH08	Wan Fo Hu Hu Da Mao Shan, Shucheng County, Lu'an City, Anhui Province	P.massoniana Lamb.	2015.08	2
AH10	Phytophthora infestans in the lower part of Fuxing Forest Farm 2, Lai'an County, Tuzhou City, Anhui Province	P.massoniana Lamb.	2015.08	2
AH12	Songwa Lake, Xinqi Village, Gaofeng Township, Shucheng County, Lu'an County, Anhui Province	P.massoniana Lamb.	2015.08	2
AH13	Mozitan, Huoshan County, Lu'an County, Anhui Province	P.massoniana Lamb.	2015.08	2
AH14	Xishan Forest Farm, Huoqiu County, Lu'an, Anhui	P.massoniana Lamb.	2016.8.8	2
AH15	Nan'an Village (Work Area), Taiping Lake Township (Forest Farm), Huangshan District, Huangshan City, Anhui Province	P.massoniana Lamb.	2016.10.18	1
AH16	Hu Jiawu Houshan, Zhangcun Village, Jiaocun Town, Anhui Province	P.massoniana Lamb.	2017.7.26	2
AH17	Ma Jia Dui Mian Shan, Longyuan Village, Jiaocun Town, Anhui Province	P.massoniana Lamb.	2017.8.6	2
AH18	Hu Jiawu Houshan, Zhangcun Village, Jiaocun Town, Anhui Province	P.massoniana Lamb.	2017.7.26	2
AH19	Under Shibi, Jiekou Formation, Longyuan Village, Jiaocun Town, Anhui Province	P.massoniana Lamb.	2017.7.26	2
AH20	Magushan Branch of Wanling Forest Farm, Xuanzhou District	P.massoniana Lamb.	2017.12.10	2
AH21	Over the river on the right side of Huangshan No. 5 Boundary Monument	P.massoniana Lamb.	2018.10.31	2
AH22	Huangshan Shuanglongtan Road, Xianggu Xi, Zhuyuan Road, 50 meters away	P.massoniana Lamb.	2018.10.30	2
AH23	Beside the grave of the founder of Cuiwei Temple in Huangshan	P.massoniana Lamb.	2018.10.30	2
AH25	50 meters behind the Huangshan Family Restaurant	P.massoniana Lamb.	2018.10.31	2
AH27	100 meters up the bamboo mountain behind the Cuiwei Temple warehouse	P.massoniana Lamb.	2018.10.31	2
AH29	Ditch at the upper right corner of Huangshan Wudaohe Tea Garden	P.massoniana Lamb.	2018.10.31	2
AH31	After the warehouse of Cuiwei Temple in Huangshan, the bamboo mountain goes up 130 meters	P.massoniana Lamb.	2018.10.31	2
AH32	Huangshan Yidaohe Tea Garden, 70m up	P.massoniana Lamb.	2018.10.31	2
AH33	Huangshan North Gate Area	P.massoniana Lamb.	2018.10.31	2
C145	Japan	unknown		2
CQ01	Qinglong Village, Qingxi Town, Fuling District, Chongqing	unknown	2014.11.27	2
CQ03	Dongquan Forest Farm, Banan District, Chongqing	P.massoniana Lamb.	2015.1.26	2
CQ04	Yunyang County, Chongqing	P.massoniana Lamb.	2015.07	2
CQ05	Zhuangzi Village, Xiongjia Town, Wanzhou District, Chongqing	P.massoniana Lamb.	2015.07	2
CQ06	Group 6, Motor Village, Xiaozhou Town, Wanzhou District, Chongqing	P.massoniana Lamb.	2015.07	2
CQ07	Changshou District, Chongqing	P.massoniana Lamb.	2015.07	2
CQ08	Jiangdong Street, Fuling District, Chongqing	P.massoniana Lamb.	2016.9.14	2
CQ09	Jiangdong Street, Fuling District, Chongqing	P.massoniana Lamb.	2016.9.14	3
CQ10	Jiangdong Street, Fuling District, Chongqing	P.massoniana Lamb.	2016.9.14	2
CQ11	Nanxi Town, Yunyang County, Chongqing	P.massoniana Lamb.	2016.9.16	2
FJ01	Cangshan District, Fuzhou City, Fujian Province	P.massoniana Lamb.	2014.12	1
FJ02	Jin'an District, Fuzhou City, Fujian Province	P.massoniana Lamb.	2014.12	1
FJ03	Canghai District, Xiamen City, Fujian Province	P.massoniana Lamb.	2014.12	2
FJ04	Tong'an District, Xiamen City, Fujian Province	P.massoniana Lamb.	2014.12	2
FJ05	Fengze District, Quanzhou City, Fujian Province	P.massoniana Lamb.	2014.12	1
FJ06	Zhao'an District, Zhangzhou City, Fujian Province	P.massoniana Lamb.	2014.12	2
FJ07	Jiangkou Town, Hanjiang District, Putian City, Fujian Province	P.massoniana Lamb.	2015.07	2
FJ08	55-7-1, Longkeng Village, Fenggang Street, Shaxian County, Fujian Province	P.massoniana Lamb.	2015.07	2
FJ10	3-5-3, Qiahu Village, Qingzhou Town, Shaxian County, Fujian Province	P.massoniana Lamb.	2015.07	2
FJ11	Laiyang Village, Licheng Street, Xianyou County, Putian City, Fujian Province	P.massoniana Lamb.	2016.8.2	2
FJ12	Xi Jie Dao Xi Cun, Meilie District, Sanming City, Fujian Province	P.massoniana Lamb.	2016.8.7	2
GD01	Fengkai County, Zhaoqing City, Guangdong Province	P.massoniana Lamb.	2015.1.19	2
GD02	Qingcheng District, Qingyuan City, Guangdong Province	P.massoniana Lamb.	2015.1.19	2
GD03	Zengcheng, Guangzhou, Guangdong	P.massoniana Lamb.	2015.1.19	2
GD04	No. 1, Huiyang Xinxu, Huiyang District, Huizhou City, Guangdong Province	P.massoniana Lamb.	2015.1.19	1
GD06	Huidong County, Huizhou City, Guangdong Province	P.massoniana Lamb.	2015.1.19	2
GD07	Longmen Marong Town 3 Linban 3 Xiaoban/Pingling Town Xiaotang Village, Longmen County, Huizhou City, Guangdong Province	P.massoniana Lamb.	2015.1.19	2
GD08	No. 1, Luofu Mountain, Boluo County, Huizhou City, Guangdong Province	P.massoniana Lamb.	2015.1.19	1
GD09	Wujiang District, Shaoguan City, Guangdong Province	P.massoniana Lamb.	2015.1.19	2
GD10	Huangpu District, Guangzhou City, Guangdong Province	P.massoniana Lamb.	2015.1.19	1
GD13	Ru Hu Zhen Shang Wei Cun, Huicheng District, Huizhou City, Guangdong Province	P.massoniana Lamb.	2015.1	1
GD14	Middle part of Xiangmu, Fengmen Community, Zhangmutou Town, Dongguan City, Guangdong Province	P.massoniana Lamb.	2015.1	1
GD15	Upper part of Phytophthora pestis in Fengmen Community, Zhangmutou Town, Dongguan City, Guangdong Province	P.massoniana Lamb.	2015.1	1
GD16	Upper part of Phytophthora pestis in Fengmen Community, Zhangmutou Town, Dongguan City, Guangdong Province	P.massoniana Lamb.	2015.1	1
GD17	No. 1, Longyandong Forest Farm, Tianhe District, Guangzhou, Guangdong	P.massoniana Lamb.	2015.1	1
GD18	No. 2, Longyandong Forest Farm, Tianhe District, Guangzhou, Guangdong	P.massoniana Lamb.	2015.1	1
GD19	No. 3, Longyandong Forest Farm, Tianhe District, Guangzhou, Guangdong	Pinus yunnanensis	2015.1	1
GD24	Sanlinban Community, Zhouzi Town, Guangning County, Guangdong Province	P.massoniana Lamb.	2017.8.1	2
GD25	Taihe Erlin Ban, Zhougushui Town, Guangning County, Guangdong Province	P.massoniana Lamb.	2017.8.1	2
GD28	No. 6, Jiaoling County, Guangdong Province	P. yunnanensis	2017.8.6	1
GD29	No. 17, Jiaoling County, Guangdong Province	P.massoniana Lamb.	2017.8.6	2
GD32	Huangtian Town, Dongyuan County, Guangdong Province	P.massoniana Lamb.	2017.8.8	1
GX01	Class 32, Class 3, Caishan Village, Shinan Town, Xingye County, Yulin City, Guangxi	P.massoniana Lamb.	2015.1	2
GX03	Shinan Town, Xingye County, Guangxi Zhuang Autonomous Region	P.massoniana Lamb.	2016.8.12	2
GX04	Xing'an County, Guilin City, Guangxi	P.massoniana Lamb.	2019.4.4	2
GZ01	Chunjia Village, Zhongxing Group, Jingu Village, Longkeng Town, Zunyi County, Guizhou Province	unknown	2014.12.8	2
GZ02	Luo Yong Cun, Changfu Group, Jingu Village, Longkeng Town, Zunyi County, Guizhou Province	unknown	2014.12.8	2
GZ03	Shaba Formation, Yuanmuyan Village, Maotai Town, Renhuai City, Guizhou Province	P.massoniana Lamb.	2014.12.8	2
GZ04	Cangkou, Zunyi City, Guizhou Province	P.massoniana Lamb.	2015.07	2
HB01	Chibi City, Hubei Province	P.massoniana Lamb.	2015.4	2
HB02	Long Zhou Ping Zhen Liu Jia Chong Cun, Changyang County, Yichang City, Hubei Province	P.massoniana Lamb.	2015.4.10	2
HB03	Yanziyan, Tanjiaba Village, Liujiaoting Office, Enshi City, Enshi Prefecture, Hubei Province	P.massoniana Lamb.	2015.4.20	2
HB04	Tianjiawan Primary School, Tanjiaba Village, Liujiaoting Office, Enshi City, Enshi Prefecture, Hubei Province	P.massoniana Lamb.	2015.4.20	2
HB05	Nanyan Reservoir, Wangjiahe Street, Huangpi District, Wuhan City, Hubei Province	P.massoniana Lamb.	2015.4.22	2
HB06	Liu Zhi Jie Dao Qun Le Zhou Jia Tian, Huangpi District, Wuhan City, Hubei Province	P.massoniana Lamb.	2015.4.22	2
HB07	Wang Jia He Jie Dao Liu Qiao Shu Jia Da Wan, Huangpi District, Wuhan City, Hubei Province	P.massoniana Lamb.	2015.4.22	2
HB08	Next to Yixing Road Gas Station, Jiangjiawan Village, Xiaoxi Tower, Yiling District, Yichang City, Hubei Province	P.massoniana Lamb.	2015.11	2
HB09	Opposite to the entrance of Yiba Expressway, Huanghua Town, Yiling District, Yichang City, Hubei Province	P.massoniana Lamb.	2015.11	2
HB10	Upper part of Muyang, Yidu District, Yichang City, Hubei Province	P.massoniana Lamb.	2015.11	2
HB12	Hedian Town, Zengdu District, Suizhou, Hubei Province	P.massoniana Lamb.	2017.8.12	2
HB13	Hedian Town, Zengdu District, Suizhou, Hubei Province	P.massoniana Lamb.	2017.8.12	2
HB15	Feng Shan Zhen Lao Tashan Cun, Luotian County, Huanggang City, Hubei Province	P.massoniana Lamb.	2017.8.12	2
HB16	Tuanbao Village, Zilin Town, Dongbao District, Jingmen City	P.massoniana Lamb.	20190812	2
HB17	Qinglongshan Forest Farm, Jiangxia District, Wuhan City	P.massoniana Lamb.	20190813	2
HB18	Yingshan County, Huanggang City	P.massoniana Lamb.	20190813	2
HB20	Jinqiao Village, Wolong Town, Xiangcheng District, Xiangyang City	P.massoniana Lamb.	20190812	2
HB21	Tea Farm, Group 1, Xiaogou Village, Chengguan Town, Baokang County, Xiangyang City	P.massoniana Lamb.	20190813	2
HB22	Wangdian Xindian Village, Dangyang City, Yichang City	P.massoniana Lamb.	20190814	2
HB23	North Slope, Group 4, Xujiawan Village, Songmuping Town, Yidu City	P.massoniana Lamb.	20190813	2
HB24	Yangjiawan, Liuyanchong Neighborhood Committee, Huya Street Office, Xiaoting District, Yichang City	P.massoniana Lamb.	20190813	2
HB25	Xiachangba, Bajiao Township, Enshi City	P.massoniana Lamb.	20190801	2
HB27	Chahe Village, Huaguo Street, Zhangxin District, Shiyan City	P.massoniana Lamb.	20190812	2
HB28	Hanjiang Street, Zhanggang District, Shiyan City	P.massoniana Lamb.	20190812	2
HB29	Yuanpu Village, Henggouqiao Town, Xian'an District, Xianning City	P.massoniana Lamb.	20190812	2
HB31	Group 4, Beimen Village, Fengming Town, Yuan'an County, Yichang City	P.massoniana Lamb.	20190812	2
HB32	Suiyingqiao Village, Maping Town, Guangshui City	P.massoniana Lamb.	20190806	2
HB33	Luotian County, Huanggang City	P.massoniana Lamb.	20190814	2
HEN06	Middle part of the trunk opposite Shuanggou Primary School, Shuanggou Village, Jingguan Town, Xichuan County, Henan Province	P.massoniana Lamb.	2017.10.27	2
HEN09	Shimen, Jingguan Town, Xichuan County, Henan Province	P.massoniana Lamb.	2017.11.10	2
HEN20	Youweizi Village, Huwan Township, Xinxian County, Henan Province	P.massoniana Lamb.	2018.10.08	1
HN01	Ling Yang Zhen Liang Xi Cun, Cili County, Zhangjiajie City, Hunan Province	P.massoniana Lamb.	2015.3	2
HN02	Yang Lou Si Zhen Dong Li Cun, Linxiang City, Yueyang City, Hunan Province	P.massoniana Lamb.	2015.3.6	2
HN03	Lannichong Formation, Shangqingxi Village, Yunxi Township, Yueyang City, Hunan Province	P.massoniana Lamb.	2015.3.19	2
HN04	Class 14, Lijia Village, Maoshi Town, Hengnan County, Hengyang City, Hunan Province	P.massoniana Lamb.	2015.3.23	2
HN05	Ling Yang Zhen, Cili County, Zhangjiajie City, Hunan Province	P.massoniana Lamb.	2015.08	2
HN07	Jianshi Town, Taoyuan County, Hunan Province	P.massoniana Lamb.	2016.8.1	2
HN08	Jianshi Town, Taoyuan County, Hunan Province	P.massoniana Lamb.	2016.8.1	2
HN09	Yujia Village, Lingling District, Yongzhou City	unknown	2019.3.28	2
HN10	Baiguo, Jiugongqiao Village, Jiugongqiao Town, Shaoyang County	P.massoniana Lamb.	2019.3.28	2
HN11	Baiguo, Jiugongqiao Village, Jiugongqiao Town, Shaoyang County	P.massoniana Lamb.	2019.3.29	2
HN15	Baiguo, Jiugongqiao Village, Jiugongqiao Town, Shaoyang County	P.massoniana Lamb.	2019.3.30	2
JS01	Liuhe Pingshan Mountain Farm, Nanjing City, Jiangsu Province	P.massoniana Lamb.	2014.12	2
JS02	Jiang Qiao Jie Dao Qiao Jia Men Cun, Runzhou District, Zhenjiang City, Jiangsu Province	P.massoniana Lamb.	2014.12.2	2
JS03	Changshan Forest Farm, Dantu District, Zhenjiang City, Jiangsu Province	P.massoniana Lamb.	2014.12.4	2
JS04	Jurong Forest Farm, Jurong City, Zhenjiang City, Jiangsu Province	P.massoniana Lamb.	2014.12.4	2
JS05	Zhongshan Mausoleum, Nanjing, Jiangsu Province	P.massoniana Lamb.	2014.12	2
JS06	Binhu District, Wuxi City, Jiangsu Province	P.massoniana Lamb.	2014.12	2
JS07	Huishan District, Wuxi City, Jiangsu Province	P.massoniana Lamb.	2014.12	2
JS08	Yixing City, Wuxi City, Jiangsu Province	P.massoniana Lamb.	2014.12	2
JS09	Shuichonggang Forest Farm, Guiwu Town, Xuyi County, Huai'an City, Jiangsu Province	P. massoniana Lamb., P. thunbergii	2015.1.8	2
JS10	Jintan Forestry Station, Changzhou City, Jiangsu Province	P.massoniana Lamb.	2015.1.8	2
JS11	Huaguoshan Street Shanchang, Haizhou District, Lianyungang City, Jiangsu Province	Pinus densiflora Sieb.et Zucc.	2015.1.9	2
JS12	Baiyang Mountain, Yizheng City, Yangzhou City, Jiangsu Province	P.massoniana Lamb.	2015.1	2
JS13	Beigu Mountain, Lianyun District, Lianyungang, Jiangsu Province	P. massoniana Lamb., P. thunbergii	2015.1	2
JS14	Laoshan Forest Farm, Pukou District, Nanjing City, Jiangsu Province	P.massoniana Lamb.	2015.2.2	2
JS15	Yushan Forest Farm, Changshu City, Suzhou City, Jiangsu Province	P.massoniana Lamb.	2015.2.10	2
JS16	Bai Ma Zhen Cao Jia Qiao, Lishui County, Nanjing City, Jiangsu Province	P.massoniana Lamb.	2015.2.3	2
JS17	Qingshan Forest Farm, Gaochun District, Nanjing City, Jiangsu Province	P.massoniana Lamb.	2015.2.3	2
JS18	Tianmuhu Town, Liyang City, Changzhou City, Jiangsu Province	P.massoniana Lamb.	2015.3	2
JS19	Back Shuangdun, Taoyuan Cemetery, Yushan Forest Farm, Changshu City	P.massoniana Lamb.	2017.10.11	2
JS20	State run Changshu Yushan Forest Farm Lost and Found Stream Forest Shed	P.massoniana Lamb.	2017.10.11	2
JS21	State run Changshu Yushan Forest Farm Taoyuanjian Xiaoshiqiao	P.massoniana Lamb.	2017.10.11	2
JS22	Underdrain of Shiziling Branch, Laoshan Forest Farm, Pukou District, Nanjing	P.massoniana Lamb.	2017.10.14	2
JS23	Mianchang Mountain, Qifosi Branch, Laoshan Forest Farm, Pukou District, Nanjing	P.massoniana Lamb.	2017.10.14	2
JS24	Shiziling Branch, Laoshan Forest Farm, Pukou District, Nanjing	P.massoniana Lamb.	2017.10.14	2
JS25	Dingshu Town, Yixing City, Wuxi City	P.massoniana Lamb.	2017.10.24	2
JS26	Dingshu Town, Yixing City, Wuxi City	P.massoniana Lamb.	2017.10.24	2
JS27	Hufu Town, Yixing City, Wuxi City	P.massoniana Lamb.	2017.10.24	2
JS29	Wuzhuang Mountain, Yizheng City, Yangzhou City	P.massoniana Lamb.	2017.10.25	2
JS30	Qingnian Mountain, Yizheng City, Yangzhou City	P.massoniana Lamb.	2017.10.25	2
JS31	Nanjing Lishui District Fangshan Branch	P.massoniana Lamb.	2017.10.24	2
JS32	Guantangba, Qiuhu Branch, Lishui District, Nanjing	P.massoniana Lamb.	2017.10.24	2
JS33	North of Maoshan Mountain, Pingshan Branch, Lishui District, Nanjing	P.massoniana Lamb.	2017.10.24	2
JS34	Old Crow in the Temple House of Longtan Forest Farm, Liyang, Changzhou	P.massoniana Lamb.	2017.10.24	2
JS35	Longxing Island, Tianmu Lake Town, Liyang, Changzhou	P.massoniana Lamb.	2017.10.24	2
JS36	Changzhou Liyang Wawu Small Forest Farm	P.massoniana Lamb.	2017.10.24	2
JS38	Xiaoxishao, Beigu Mountain, Lianyun District, Lianyungang City	Pinus thunbergii	2017.11.6	2
JS39	Yandungou, Beigu Mountain, Lianyun District, Lianyungang City	P. thunbergii	2017.11.6	2
JS41	Jiangqiao Street, Runzhou District, Zhenjiang City	P.massoniana Lamb.	2017.11.6	2
JS42	Jiangqiao Street, Runzhou District, Zhenjiang City	P.massoniana Lamb.	2017.11.6	2
JS44	Zhenjiang Jurong Dongjin Forest Farm	P.massoniana Lamb.	2017.10.28	2
JS45	Zhenjiang Jurong Dongjin Forest Farm	P.massoniana Lamb.	2017.10.28	2
JS47	Hongmu Mountain, Jiangning District, Nanjing City	P.massoniana Lamb.	2017.10.19	2
JS48	Tea Mountain, Jiangning District, Nanjing	P.massoniana Lamb.	2017.10.19	2
JS49	Xundoudun, Maodong Forest Farm, Jintan District, Changzhou City	P.massoniana Lamb.	2017.10.20	2
JS50	Baihu Mountain, Maodong Forest Farm, Jintan District, Changzhou City	P.massoniana Lamb.	2017.10.20	2
JS55	Mountain production in Binhu District, Wuxi City	P. thunbergii	2017.10.18	2
JS56	Nanxiangshan, Junzhang Community, Binhu District, Wuxi City	P.massoniana Lamb.	2017.10.20	2
JS58	Zhongshan Mausoleum, Xuanwu District, Nanjing	P.massoniana Lamb.	2017.11.1	2
JS61	Huai'an Xuyi Linchang Shanhong Fenchang Xi'e Station	P.massoniana Lamb.	2017.11.1	2
JS62	Huai'an Xuyi Linchang Shanhong Fenchang Xi'e Station	P.massoniana Lamb.	2017.11.1	2
JS63	Huai'an Xuyi Linchang Shanhong Fenchang Xi'e Station	P.massoniana Lamb.	2017.11.1	2
JS64	Xigang Street, Qixia District, Nanjing	P.massoniana Lamb.	2017.11.6	2
JS65	Xigang Street, Qixia District, Nanjing	P.massoniana Lamb.	2017.11.6	2
JS67	Jianshan, Yuhuatai District, Nanjing	P.massoniana Lamb.	2017.10.28	2
JS70	Dongshan Working Area, Pingshan Forest Farm, Liuhe District, Nanjing	P.massoniana Lamb.	207.10.30	2
JX04	Yutian Reservoir, Xianghu Town, Fuliang County, Jingdezhen, Jiangxi Province	P.massoniana Lamb.	2014.11.20	2
JX07	Nankang City, Ganzhou City, Jiangxi Province/Zhanggong County	P.massoniana Lamb.	2014.12	2
JX08	Wei Jia Zhen Jiu Xing Cun, Lushan District, Jiujiang City, Jiangxi Province	P.massoniana Lamb.	2015.1	2
JX09	Pengze County, Jiujiang City, Jiangxi Province	P.massoniana Lamb.	2015.1	2
JX11	Cai Ling Zhen, Duchang County, Jiujiang City, Jiangxi Province	P.massoniana Lamb.	2015.3	2
JX19	Jingqiao Village, Xiefang Town, Ruijin City	P.massoniana Lamb.	20190819	2
JX20	Datang Yangjia Houlong Mountain, Liwu Village, Xiugu Town, Jinxi Town, Fuzhou City	P.massoniana Lamb.	20190819	2
JX21	Shizhuang Township, Chongren County, Fuzhou City	P.massoniana Lamb.	20190819	2
LN01	Dalian, Liaoning Province	unknown	2016.10.20	2
LN04	Dalian, Liaoning Province	unknown	2016.10.20	2
LN05	Dongling, Shenyang, Liaoning	Pinus tabuliformis Carr.	2017.8.20	2
LN06	Dongling, Shenyang, Liaoning	P. tabuliformis Carr.	2017.8.20	2
LN07	Dongling, Shenyang, Liaoning	P. tabuliformis Carr.	2017.8.20	2
LN08	Dongling, Shenyang, Liaoning	P. tabuliformis Carr.	2017.8.20	2
LN09	Dongling, Shenyang, Liaoning	P. tabuliformis Carr.	2017.8.20	2
LN10	Xinfu County, Fushun City, Liaoning Province	P. tabuliformis Carr.	2017.8.19	2
LN11	Benxi City Nanfen District Sishan Lingxia Office Houta Village 3 Forest Class 6 Small Class	unknown	2017.8.16	2
LN12	Huang Qi Zhai Zhen Lan Qi Zhai Cun, Kaiyuan City, Tieling City, Liaoning Province	P. tabuliformis Carr.	2017.11.30	2
LN13	Huang Qi Zhai Zhen Lan Qi Zhai Cun, Kaiyuan City, Tieling City, Liaoning Province	P. tabuliformis Carr.	2017.11.30	2
LN14	Hongtou Mountain, Qingyuan County, Fushun, Liaoning	Larix gmelinii (Rupr.) Kuzen.	2018.9.25	2
LN15	Hongtou Mountain, Qingyuan County, Fushun, Liaoning	L. gmelinii (Rupr.) Kuzen.	2018.9.25	2
LN16	Xinbin, Fushun, Liaoning	L. gmelinii (Rupr.) Kuzen.	2018.9.25	2
LN17	Xinbin, Fushun, Liaoning	L. gmelinii (Rupr.) Kuzen.	2018.9.25	2
LN18	Fushun, Liaoning	L. gmelinii (Rupr.) Kuzen.	2018.9.25	2
OKD	Japan	unknown		1
SC02	Zhongshan Temple Reservoir, Group 11, Wangzhong Village, Yuejiang Town, Gao County, Yibin City, Sichuan Province	P.massoniana Lamb.	2015.3.20	2
SC03	Jinzichong, Group 15, Zhou'an Village, Fushan Town, Fushun County, Zigong City, Sichuan Province	P.massoniana Lamb.	2015.3.20	2
SC04	Gaoposhang, Group 5, Tianshun Village, Xiangbi Street, Cuiping District, Yibin City, Sichuan Province	P.massoniana Lamb.	2015.3.20	2
SC05	Group 1, Maqiaojin Village, Ba'er Township, Linshui County, Guang'an City, Sichuan Province	P.massoniana Lamb.	2015.3.20	2
SC07	Dachong, Wuli Village, Shuangyi Town, Yibin County, Yibin City, Sichuan Province	P.massoniana Lamb.	2015.3.30	2
SC10	Dawan Group, Jiangba Village, Pingshan Town, Yibin City, Sichuan Province	P.massoniana Lamb.	2015.11	2
SC11	Yibin City, Sichuan Province (CHEN)	P.massoniana Lamb.	2015.11	2
SC12	Yibin City, Sichuan Province (CHEN)	P.massoniana Lamb.	2015.11	2
SC13	Yibin City, Sichuan Province (CHEN)	P.massoniana Lamb.	2015.11	2
SC14	Sichuan Province	unknown		1
SC17	Xishan Forest Park, Taiping Town, Jiangyou City, Sichuan Province	P.massoniana Lamb.	2017.8.7	2
SC18	Dachuan District, Dazhou City, Sichuan Province	P.massoniana Lamb.	2019.3.28	2
SC19	Guanghui Town, Bazhou District, Bazhong City, Sichuan Province	P.massoniana Lamb.	2019.3.28	2
SD02	Shidao Mountain, Rongcheng City, Weihai City, Shandong Province	unknown	2014.12.6	2
SD03	Hushan Town, Rongcheng City, Weihai City, Shandong Province	unknown	2014.12.6	2
SD05	The junction of Wendeng City and Rushan, Weihai City, Shandong Province	P. thunbergii	2014.8.13	2
SD06	Beidao, Zhifu District, Yantai City, Shandong Province	P.massoniana Lamb.	2015.07	2
SX01	Chengguan Town, Shiquan County, Ankang City, Shaanxi Province	unknown	2014.11.19	2
SX02	Chengguan Town, Shiquan County, Ankang City, Shaanxi Province	unknown	2014.11.19	2
SX03	Chengguan Town, Shiquan County, Ankang City, Shaanxi Province	unknown	2014.11.19	2
SX04	Sang Xi Zhen Sang Xi Gou Cun, Yang County, Hanzhong City, Shaanxi Province	P.massoniana Lamb.	2015.07	2
SX06	Group 2, Maping Village, Xialiang Town, Zhashui County, Shangluo City, Shaanxi Province	P.massoniana Lamb.	2015.07	2
SX09	Fobu, Shaanxi Province	P.massoniana Lamb.	2016.10.20	2
SX10	Zhenluo, Shaanxi	P.massoniana Lamb.	2016.10.20	2
SX11	Zhenluo, Shaanxi	P.massoniana Lamb.	2016.10.20	2
SX12	Zhenluo, Shaanxi	P.massoniana Lamb.	2016.10.20	2
SX13	Da He Ba Zhen Sha Ping Wu Si Cun, Foping County, Hanzhong City, Shaanxi Province	P.massoniana Lamb.	2017.8.13	2
SX14	Da He Ba Zhen Sha Ping Wu Si Cun, Foping County, Hanzhong City, Shaanxi Province	P.massoniana Lamb.	2017.8.13	2
SX16	Da He Ba Zhen Sha Ping Wu Si Cun, Foping County, Hanzhong City, Shaanxi Province	P.massoniana Lamb.	2017.8.13	2
SX17	Ningshan County, Shaanxi Province (bottom)	P. tabuliformis Carr.	2017.8.19	2
YN01	No. 6 Rong Coal Mine, Shuifu County, Zhaotong City, Yunnan Province	P.massoniana Lamb.	2015.1	2
ZJ01	Zhenhai District, Ningbo City, Zhejiang Province	P.massoniana Lamb.	2014.12	2
ZJ02	Beicang District, Ningbo City, Zhejiang Province	P.massoniana Lamb.	2014.12	2
ZJ03	Yuyao District, Ningbo City, Zhejiang Province	P.massoniana Lamb.	2014.12	2
ZJ04	Fenghua District, Ningbo City, Zhejiang Province	P.massoniana Lamb.	2014.12	2
ZJ05	Ninghai County, Ningbo City, Zhejiang Province	P.massoniana Lamb.	2014.12	2
ZJ06	Teng Qiao Zhen Shan An Cun, Lucheng District, Wenzhou City, Zhejiang Province	P.massoniana Lamb.	2014.8.15	2
ZJ07	Jiuhuang Mountain, Pingyang County, Wenzhou City, Zhejiang Province	P.massoniana Lamb.	2014.8.15	3
ZJ08	Ping Dui Ban Shan An, Pingyang County, Wenzhou City, Zhejiang Province	P.massoniana Lamb.	2014.8.15	2
ZJ09	Wu Yun Jie Dao Jian She Cun, Jinyun County, Lishui City, Zhejiang Province	P.massoniana Lamb.	2015.1.9	2
ZJ10	Bai Yun Jie Dao Deng Ta Cun, Liandu District, Lishui City, Zhejiang Province	P.massoniana Lamb.	2015.1.10	2
ZJ11	Huangyan District, Taizhou City, Zhejiang Province	P.massoniana Lamb.	2015.2	2
ZJ12	Bai Guan Jie Lu Dong Cun, Shangyu District, Shaoxing City, Zhejiang Province	P.massoniana Lamb.	2015.3.4	2
ZJ13	Tiantai County, Taizhou City, Zhejiang Province	unknown	2015.3.6	2
ZJ14	Dinghai District, Zhoushan City, Zhejiang Province	unknown	2015.3	2
ZJ15	Wenling City, Taizhou City, Zhejiang Province	unknown	2015.3	2
ZJ16	Zhejiang Hangzhou Fuyang District Phytophthora Treatment Plant	P.massoniana Lamb.	2015.3.11	2
ZJ17	Yang Yang Jie Dao Guo Qing Cun, Linhai City, Taizhou City, Zhejiang Province	P.massoniana Lamb.	2015.3.11	2
ZJ18	Zhu Shajian Nansha, Putuo District, Zhoushan City, Zhejiang Province	P. thunbergii	2015.3.5	2
ZJ19	Jia Pu Xiang Shan Cun, Changxing County, Huzhou City, Zhejiang Province	P.massoniana Lamb.	2015.3	2
ZJ20	Pinghu City, Jiaxing City, Zhejiang Province	unknown	2015.3	2
ZJ21	Haiyan County, Jiaxing City, Zhejiang Province	unknown	2015.3	2
ZJ22	Xiangshan County, Ningbo City, Zhejiang Province	unknown	2015.3	2
ZJ24	Yinzhou District, Ningbo City, Zhejiang Province	unknown	2015.3	2
ZJ25	Daixi Town, Wuxing District, Huzhou City, Zhejiang Province	P.massoniana Lamb.	2015.3.10	2
ZJ26	Deqing County, Huzhou City, Zhejiang Province	P.massoniana Lamb.	2015.3	2
ZJ27	Jiu Ling Cun, Tonglu County, Hangzhou City, Zhejiang Province	unknown	2014.8.10	2
ZJ28	Tiantai County, Taizhou City, Zhejiang Province (Chicheng Street, Sanhe Town)	P.massoniana Lamb.	2015.07	2
ZJ29	Tiantai County, Taizhou City, Zhejiang Province (Chicheng Street, Sanhe Town)	P.massoniana Lamb.	2015.07	2
ZJ30	Yayang Town, Taishun County, Zhejiang Province	P.massoniana Lamb.	2017.8.2	2
ZJ31	Pengxi Town, Taishun County, Zhejiang Province	P.massoniana Lamb.	2017.8.2	2
